# Supplementary material for: Formation and down/up conversion luminescence of Ln3+doped NaY(MoO4)2microcrystals
Source: Royal Society of Chemistry journal article supplement (doi:10.1039/c2dt32687f), 2012-12-12
Supplement: c2dt32687f.pdf [file c2dt32687f.pdf]

# Supporting Information

## Formation and down/up conversion luminescence of Ln<sup>3+</sup> doped NaY(MoO<sub>4</sub>)<sub>2</sub> microcrystals

Ying Li, Guofeng Wang,\* Kai Pan, Yang Qu, Shuai Liu, and Li Feng

*Key Laboratory of Functional Inorganic Material Chemistry, Ministry of Education,  
School of Chemistry and Materials Science, Heilongjiang University, Harbin,  
150080, P. R. China. E-mail: [wanggf75@gmail.com](mailto:wanggf75@gmail.com)*

Figure S1

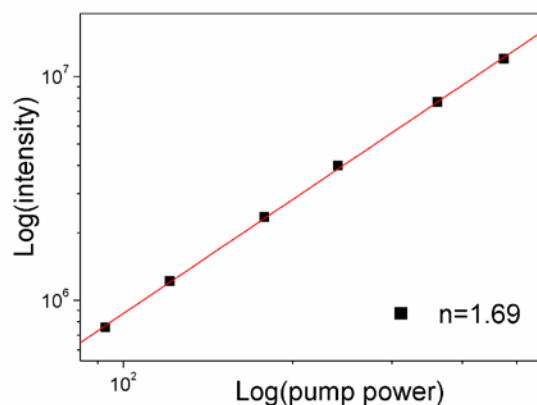

**Figure S1.** Plots (log-log) of emission intensity versus excitation power in NaY(MoO<sub>4</sub>)<sub>2</sub>:Yb<sup>3+</sup>/Er<sup>3+</sup> (Ln(NO<sub>3</sub>)<sub>3</sub>:Na<sub>2</sub>MoO<sub>4</sub>=1:5; pH = 4).

Figure S2

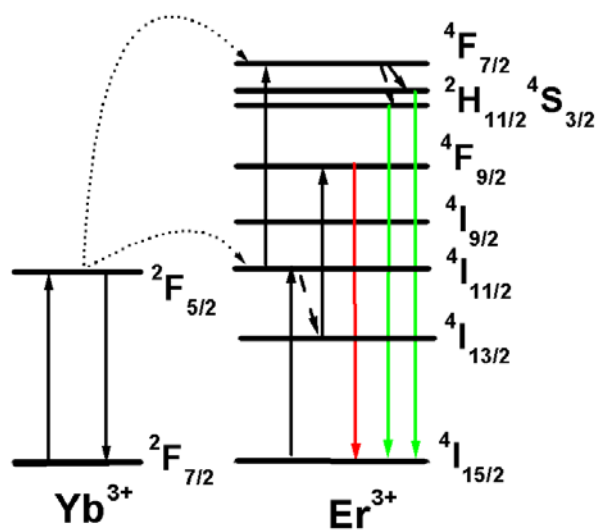

**Figure S2.** Energy-level and UC schemes for the  $\text{Yb}^{3+}$ - $\text{Er}^{3+}$  system.

Figure S3

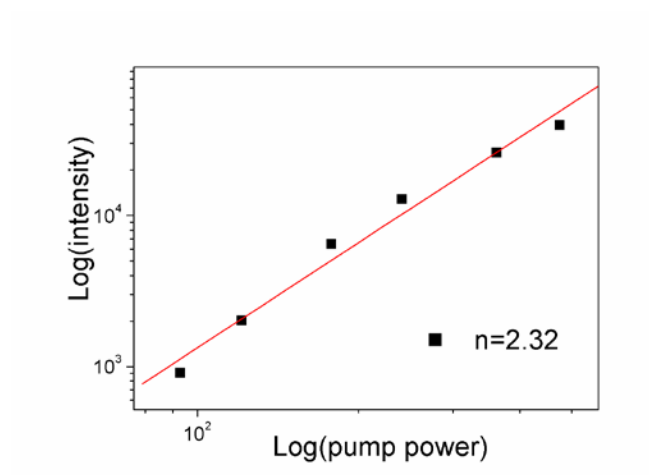

**Figure S3.** Plots (log-log) of emission intensity versus excitation power in  $\text{NaY}(\text{MoO}_4)_2:\text{Yb}^{3+}/\text{Tm}^{3+}$  ( $\text{Ln}(\text{NO}_3)_3:\text{Na}_2\text{MoO}_4=1:5$ ;  $\text{pH} = 4$ ).

Figure S4

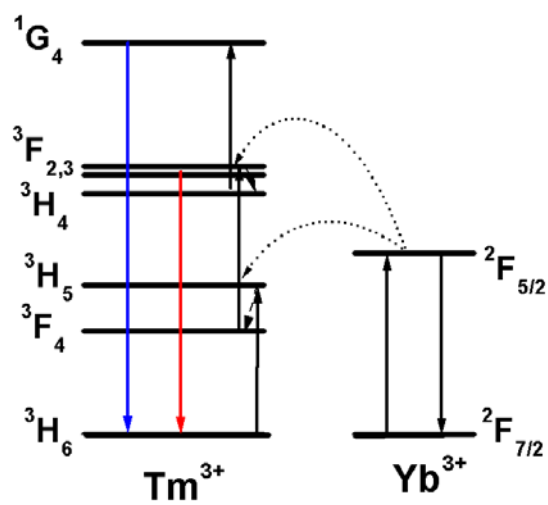

**Figure S4.** Energy-level and UC schemes for the Yb<sup>3+</sup>-Tm<sup>3+</sup> system.
